# Supplementary material
Source: HighWire-hosted journal article supplement (https://bmjopen.bmj.com/content/15/3/e087368)
Supplement: inline-supplementary-material-1 [file inline-supplementary-material-1.pdf]

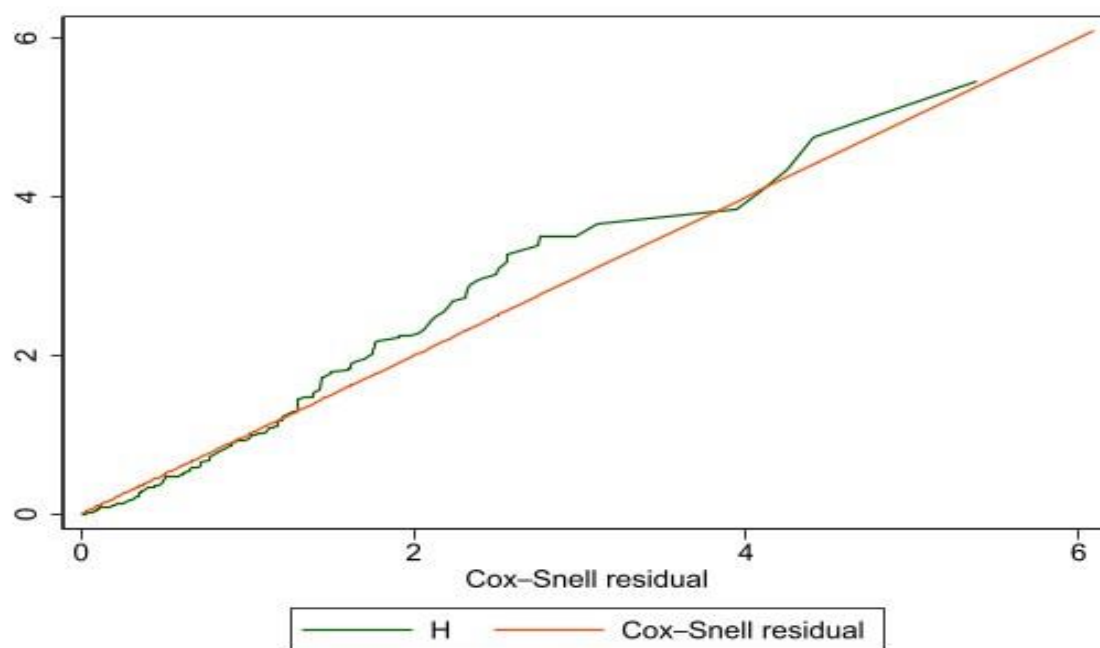

Figure 1: Cox-Snell Residual plot of the multivariable Cox-regression model for time to recovery from severe pneumonia admitted to Asella Referral and Teaching Hospital, Asella, Ethiopia
